# Supplementary material
Source: PubMed Central journal article supplement (PMC2980823)

S1

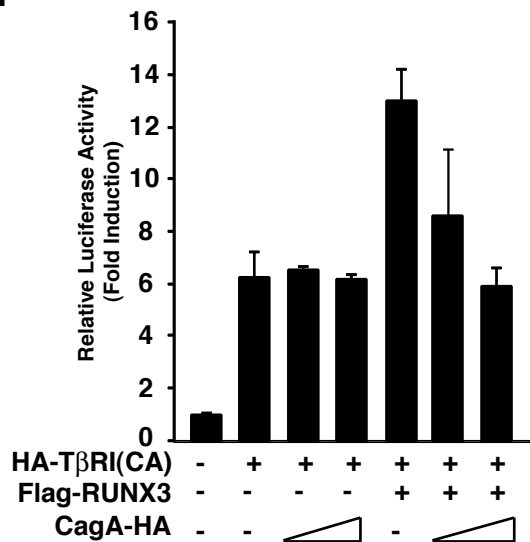

S2

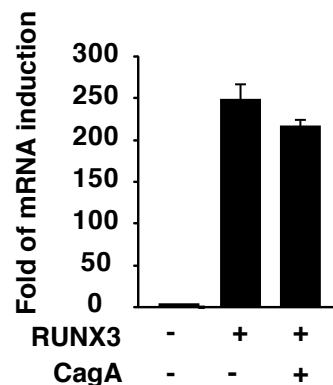

S3

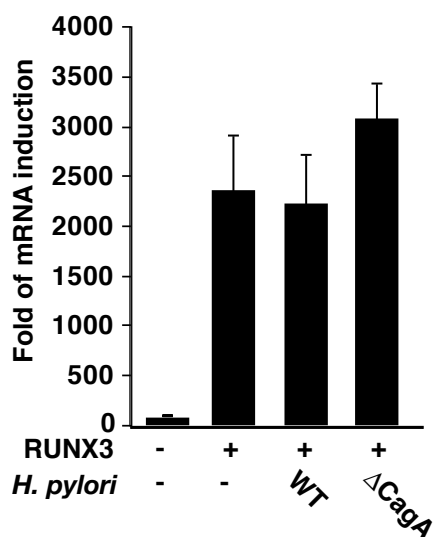

S4

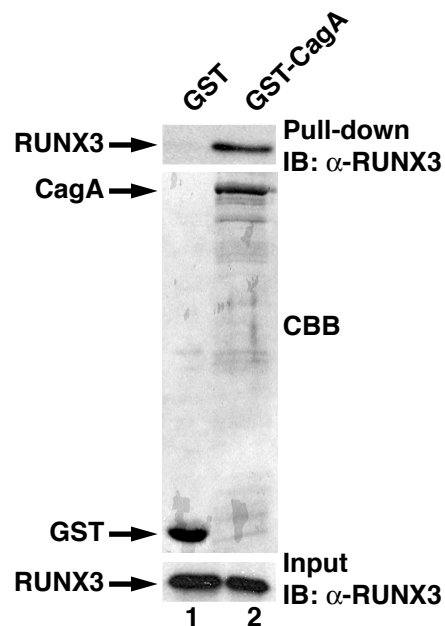

S5

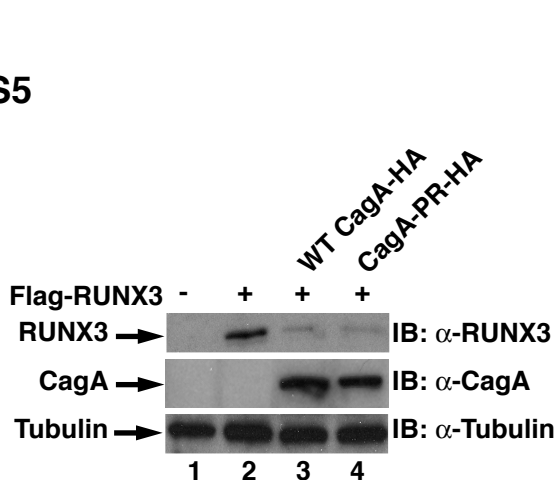

S6

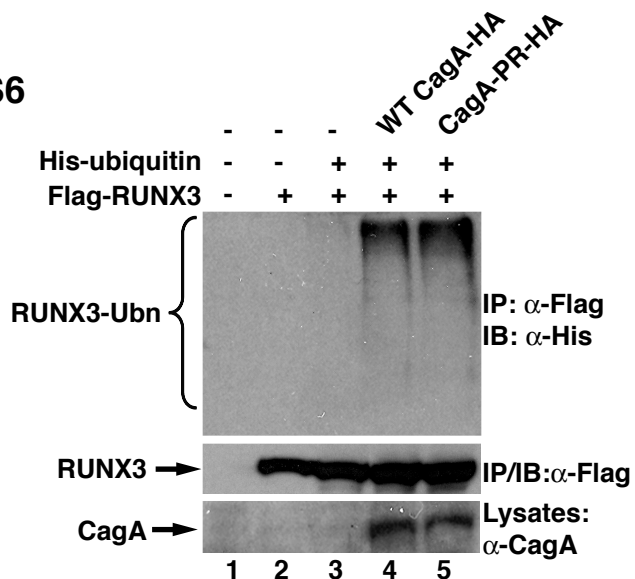

Supplement: NIHMS249088-supplement-supplementary_data.pdf [file NIHMS249088-supplement-supplementary_data.pdf]
